# Supplementary material
Source: publisher site journal article supplement (https://www.dovepress.com/article/335028)
Supplement: Supplementary file 1 [file get_supplementary_file.php]

## **SUPPLEMENTAL INFORMATION**

### **Therapeutic Potential of Vortioxetine for Anxious Depression: A Post Hoc Analysis of Data From a Clinical Trial Conducted in Japan**

Takeshi Inoue,<sup>1</sup> Shinji Fujimoto,<sup>2</sup> Tatsuro Marumoto,<sup>2</sup> Tadayuki Kitagawa,<sup>3</sup> Kazuyuki Ishida,<sup>3</sup> Tadashi Nakajima,<sup>2</sup> Yoshiya Moriguchi,<sup>4</sup> Keita Fujikawa,<sup>2</sup> Koichiro Watanabe<sup>5</sup>

<sup>1</sup>Department of Psychiatry, Tokyo Medical University, Tokyo, Japan; <sup>2</sup>Japan Medical Office, Takeda Pharmaceutical Co., Ltd, Tokyo, Japan; <sup>3</sup>Takeda Development Center – Japan, Takeda Pharmaceutical Co., Ltd, Osaka, Japan; <sup>4</sup>Medical Affairs, Lundbeck Japan K.K., Tokyo, Japan; <sup>5</sup>Department of Neuropsychiatry, Kyorin University School of Medicine, Tokyo, Japan

**Correspondence:** Takeshi Inoue

Department of Psychiatry, Tokyo Medical University, 6-7-1 Nishishinjuku, Shinjuku-ku, Tokyo 160-0023, Japan

Tel +81-3-3342-6111 (ext. 5754)

Fax +81-3-3340-4499

Email [tinoue@tokyo-med.ac.jp](mailto:tinoue@tokyo-med.ac.jp)

ORCID ID: 0000-0001-5248-1289

## **S1** List of Independent Ethics Committees/Institutional Review Boards

ClinicalTrials.gov identifier for primary study: NCT02389816.

- Institutional Review Board of Medical Corporation Jisenkai Nankokorono Clinic
- Suzuki Internal & Circulatory Medical Clinic Institutional Review Board
- Institutional Review Board of Medical Corporation Jisenkai Ichigaya-Himorogi Clinic
- Sugiura Clinic Institutional Review Board
- Shin-Nihonbashi Ishii Clinic Institutional Review Board
- Sakayori Clinic Institutional Review Board
- Review Board of Human Rights and Ethics for Clinical Studies Institutional Review Board
- Adachi Kyou Sai Hospital Institutional Review Board
- Japan Community Health-care Organization, Tokyo Shinjuku Medical Center Institutional Review Board
- Yamate Dermatological Clinic Institutional Review Board
- Clinical Research Hospital Tokyo Institutional Review Board
- Mizuo Clinic Institutional Review Board
- Yoyogi Mental Clinic Institutional Review Board
- Haradoi Hospital Institutional Review Board
- Goshogatani Home Clinic Institutional Review Board
- Yuge Neuropsychiatric Hospital Institutional Review Board
- Sapporo Psychotropic Institutional Review Board
- National Hospital Organization Kanazawa Medical Center Institutional Review Board
- Japan Conference of Clinical Research Institutional Review Board
- Nishi Hospital Institutional Review Board
- Hanna Hospital Institutional Review Board
- Imazato Gastrointestinal Hospital Institutional Review Board
- Institutional Review Board of Non-profit organization Tokyo Allergy and Respiratory Disease Research Institute
- Kyorin University Hospital Institutional Review Board
- Akasaka Clinic Institutional Review Board

**S2 LS Mean Difference in MADRS Subscale Scores Versus Placebo, From Baseline to Week 8 (LOCF; Subgroup Analysis)**

| Subscale                   | Anxious Depression              |                                 | Non-Anxious Depression          |                                 |
|----------------------------|---------------------------------|---------------------------------|---------------------------------|---------------------------------|
|                            | Vortioxetine<br>10 mg<br>(n=94) | Vortioxetine<br>20 mg<br>(n=97) | Vortioxetine<br>10 mg<br>(n=71) | Vortioxetine<br>20 mg<br>(n=65) |
| Apparent sadness           | -0.36                           | -0.56                           | -0.31                           | -0.27                           |
| Reported sadness           | -0.61                           | -0.74                           | -0.05                           | -0.12                           |
| Inner tension              | -0.29                           | -0.51                           | -0.26                           | -0.30                           |
| Reduced sleep              | -0.41                           | -0.39                           | -0.15                           | 0.08                            |
| Reduced appetite           | -0.56                           | -0.55                           | -0.06                           | 0.18                            |
| Concentration difficulties | -0.20                           | -0.38                           | -0.29                           | -0.25                           |
| Lassitude                  | -0.21                           | -0.34                           | -0.10                           | -0.13                           |
| Inability to feel          | -0.26                           | -0.42                           | -0.22                           | -0.13                           |
| Pessimistic thoughts       | -0.45                           | -0.45                           | -0.11                           | -0.04                           |
| Suicidal thoughts          | -0.16                           | -0.27                           | -0.01                           | 0.03                            |

Anxious depression was defined by a HAM-D anxiety/somatization factor score  $\geq 7$ , whereas non-anxious depression was defined by a score  $< 7$ . The HAM-D anxiety/somatization factor score is derived from the sum of the following subscales: Q10, Anxiety (psychic); Q11, Anxiety (somatic); Q12, Somatic Symptoms (G.I.); Q13, Somatic Symptoms (general); Q15, Hypochondriasis; and Q17, Insight. HAM-D, Hamilton Depression Rating Scale; LOCF, last observation carried forward; LS, least-squares; MADRS, Montgomery-Åsberg Depression Rating Scale.

**S3** Changes in HAM-D17, DSST, SDS, and PDQ-5 From Baseline at Week 8 (LOCF; Subgroup Analysis)

| Outcome Measure | Subgroup               | Treatment          | n  | LS Mean Change | SE   | LS Mean Difference From Placebo | 95% CI       |
|-----------------|------------------------|--------------------|----|----------------|------|---------------------------------|--------------|
| HAM-D17         | Anxious depression     | Placebo            | 85 | -7.90          | 0.75 | -                               | -            |
|                 |                        | Vortioxetine 10 mg | 93 | -10.29         | 0.72 | -2.39                           | -4.44, -0.34 |
|                 |                        | Vortioxetine 20 mg | 94 | -11.19         | 0.72 | -3.29                           | -5.33, -1.24 |
|                 | Non-anxious depression | Placebo            | 68 | -8.96          | 0.76 | -                               | -            |
|                 |                        | Vortioxetine 10 mg | 70 | -10.06         | 0.75 | -1.11                           | -3.22, 1.00  |
|                 |                        | Vortioxetine 20 mg | 64 | -8.71          | 0.79 | 0.25                            | -1.92, 2.41  |
| DSST            | Anxious depression     | Placebo            | 91 | 3.33           | 0.87 | -                               | -            |
|                 |                        | Vortioxetine 10 mg | 94 | 4.72           | 0.86 | 1.38                            | -1.02, 3.78  |
|                 |                        | Vortioxetine 20 mg | 97 | 5.32           | 0.84 | 1.99                            | -0.39, 4.37  |
|                 | Non-anxious depression | Placebo            | 70 | 6.96           | 0.90 | -                               | -            |
|                 |                        | Vortioxetine 10 mg | 69 | 3.32           | 0.90 | -3.64                           | -6.15, -1.13 |
|                 |                        | Vortioxetine 20 mg | 65 | 4.06           | 0.93 | -2.89                           | -5.44, -0.35 |

|       |                        |                    |    |       |      |       |              |
|-------|------------------------|--------------------|----|-------|------|-------|--------------|
| SDS   | Anxious depression     | Placebo            | 85 | -2.68 | 0.62 | -     | -            |
|       |                        | Vortioxetine 10 mg | 93 | -4.47 | 0.59 | -1.79 | -3.47, -0.10 |
|       |                        | Vortioxetine 20 mg | 94 | -5.03 | 0.59 | -2.35 | -4.04, -0.67 |
|       | Non-anxious depression | Placebo            | 68 | -3.05 | 0.64 | -     | -            |
|       |                        | Vortioxetine 10 mg | 70 | -3.83 | 0.63 | -0.77 | -2.55, 1.00  |
|       |                        | Vortioxetine 20 mg | 64 | -3.57 | 0.67 | -0.51 | -2.34, 1.32  |
| PDQ-5 | Anxious depression     | Placebo            | 91 | -1.43 | 0.32 | -     | -            |
|       |                        | Vortioxetine 10 mg | 94 | -2.26 | 0.32 | -0.83 | -1.72, 0.07  |
|       |                        | Vortioxetine 20 mg | 97 | -2.89 | 0.31 | -1.45 | -2.34, -0.57 |
|       | Non-anxious depression | Placebo            | 70 | -1.38 | 0.34 | -     | -            |
|       |                        | Vortioxetine 10 mg | 71 | -2.30 | 0.34 | -0.92 | -1.86, 0.02  |
|       |                        | Vortioxetine 20 mg | 65 | -2.40 | 0.35 | -1.02 | -1.99, -0.05 |

Anxious depression was defined by a HAM-D anxiety/somatization factor score  $\geq 7$ , whereas non-anxious depression was defined by a score  $< 7$ . The HAM-D anxiety/somatization factor score is derived from the sum of the following subscales: Q10, Anxiety (psychic); Q11, Anxiety (somatic); Q12, Somatic Symptoms (G.I.); Q13, Somatic Symptoms (general); Q15, Hypochondriasis; and Q17, Insight. CI, confidence interval; DSST, Digit Symbol Substitution Test; HAM-D, Hamilton Depression Rating Scale; LOCF, last observation carried forward; LS, least-squares; PDQ-5, Perceived Deficit Questionnaire-5; SDS, Sheehan Disability Scale; SE, standard error.
